RESEARCH ARTICLE

# Prevalence of anemia and its associated factors among children under five years of age attending at Guguftu health center, South Wollo, Northeast Ethiopia

Angesom Gebreweld<sup>1\*</sup>, Neima Ali<sup>2</sup>, Radiya Ali<sup>2</sup>, Temesgen Fisha<sup>1</sup>

**1** Department of Medical Laboratory Science, College of Medicine and Health Science, Wollo University, Dessie, Ethiopia, **2** Department of Laboratory, Dessie Referral Hospital, Dessie, Ethiopia

\* [afsaha@gmail.com](mailto:afsaha@gmail.com)

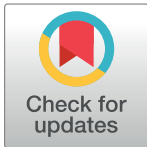

## Abstract

### Background

Anemia during childhood adversely affects mental, physical and social development of the children. This study is aimed to assess the prevalence of anemia and its associated factors among children less than five years of age in Guguftu, South Wollo, Northeast Ethiopia.

### Method

A cross-sectional health facility based study was conducted among 404 children aged 6 to 59 months. Systematic random sampling technique was used to include the participants. Pretested and structured questionnaires were used to collect socioeconomic and demographic characteristics of the family and child. Data on nutritional status, capillary blood and stool samples were collected from each child. Multivariate logistic regression was used to calculate adjusted odds ratios and the corresponding 95% confidence intervals.

### Result

The overall prevalence of anemia was 41.1% (95% CI: 36.6% - 45.8%). Of the anemic under five children, 112 (67.5%) had mild anemia, 52(31.3%) had moderate anemia, and 2(1.2%) had severe anemia. Children who were in the age group of 6–11(AOR = 4.52; 95% CI: 1.67–12.34) and 12–23 (AOR = 2.79; 95% CI: 1.04–7.51) months, living in an urban (AOR = 1.83; 95% CI: 1.05–3.18), with no formal education mothers (AOR = 7.05; 95% CI: 2.93–17.01) and primary education mothers (AOR = 3.26; 95% CI: 1.29–8.24), with a family monthly income of <750 ETB(AOR = 5.19; 95% CI: 1.24–21.75) and 750–1500 ETB(AOR = 5.89; 95% CI: 1.45–23.98), with early (<6 months) introduction of complementary foods (AOR = 3.53; 95% CI: 1.23–10.18), Underweight (AOR = 2.11; 95% CI: 1.21–3.69) were more likely to become anemic.

## OPEN ACCESS

**Citation:** Gebreweld A, Ali N, Ali R, Fisha T (2019) Prevalence of anemia and its associated factors among children under five years of age attending at Guguftu health center, South Wollo, Northeast Ethiopia. PLoS ONE 14(7): e0218961. <https://doi.org/10.1371/journal.pone.0218961>

**Editor:** Seth Adu-Afarwuah, University of Ghana, GHANA

**Received:** January 12, 2019

**Accepted:** June 12, 2019

**Published:** July 5, 2019

**Copyright:** © 2019 Gebreweld et al. This is an open access article distributed under the terms of the [Creative Commons Attribution License](https://creativecommons.org/licenses/by/4.0/), which permits unrestricted use, distribution, and reproduction in any medium, provided the original author and source are credited.

**Data Availability Statement:** All relevant data are within the manuscript and Supporting Information files.

**Funding:** The authors received no specific funding for this work.

**Competing interests:** The authors have declared that no competing interests exist.

## Conclusion

This study has revealed that the prevalence of anemia in children less than five years is high and a severe public health problem in the study area. Therefore, the policymakers should make a strategy that can reduce poverty and increase the awareness of women on breast-feeding, nutrition, and other associated factors to reduce anemia.

## Introduction

Anemia can be defined as a reduction in hemoglobin (Hb) concentration, hematocrit, or a number of red blood cells per liter below the reference interval for healthy individuals of similar age, sex, and race, under similar environmental conditions[1]. According to the World Health Organization (WHO), for under five children, the threshold Hb level for being anemic is less than 110 g/l[2].

Anemia is a global public health problem which affects 1.62 billion (24.8%) people worldwide. It occurs at all stages of the life cycle but is more prevalent in pre-school aged children (under five years). Globally, 293.1 million (47.4%) under five year's children are anemic and 67.6% of these children live in Africa [3, 4]. In Ethiopia, 57% of children age 6–59 months was anemic according to the Ethiopian 2016 Demographic and Health Survey (EDHS)report[5].

Several factors contribute to the occurrence of anemia and nearly half of (43%) the anemia cases in childhood are due to iron deficiency [6]. The deficiency may result from inadequate dietary intake of iron, malabsorption of iron, an increased iron demand during rapid growth in children and chronic blood loss. Other causes of anemia include folate and vitamin B12 and A deficiencies, Malaria, intestinal helminths, viral infections, chronic disease, hemoglobinopathies, hemolysis, and bone marrow disorders[7–10]. Different studies also claimed that factors such as age, sex, residence, early initiation of complementary food, under-nutrition, maternal health status, maternal education, and poor socioeconomic status are significantly associated with anemia [11–13].

Anemia during childhood adversely affects mental, physical and social development of the children in short- and long-term outcome; it causes abnormalities of immune function, poor motor and cognitive development, poor school performance, and reduced work productivity in the life of the children, thereby decreasing earning potentials and negatively affect national economic growth. [14–17]. Anemia is also an important cause of morbidity and mortality in African children where resources to determine the underlying etiology remain poor [18].

Even though the national and regional prevalence of anemia in under five years children are available in Ethiopia [5], data on the magnitude of anemia and its risk factors in specific settings are scarce. Studying the specific etiology and prevalence of anemia in a given setting and population group is very important to prevent or treat anemia [2]. Therefore, this study is aimed to assess the prevalence of anemia and its associated factors among children under five years of age in Gugufu, South Wollo, Northeast Ethiopia.

## Materials and methods

### Study design, period and setting

A cross-sectional health facility based study was conducted to assess the prevalence and associated risk factors of anemia among children aged 6–59 months attending at Gugufu health center from November 2017 to February 2018. Gugufu health center is located in Gugufu town

in Dessie zuria woreda of South Wollo, Amhara regional state, Ethiopia. Gugufu town is 433 km far from Addis Ababa, the capital city of Ethiopia and 43 km from Dessie. The town lies between latitude 11 degree North 08°47' and longitude 39 degrees East 38°55' and founded at 3,975 meters above sea level. Most of the people live depend on agriculture, others depending on trade. The health center provides medical service to a catchment population of 32,000. The estimated number of children aged under five in the general population during the study period were 2257. The health center has under five outpatient department and other departments. On average 10–15 children visited under five outpatient department on daily bases.

## Population

A total of 404 under-five children were included from the children's outpatient department of Gugufu health center. The sample size was calculated using single proportion formula:  $n = \left( z_{\alpha/2} \right)^2 \frac{p(1-p)}{d^2}$  with an assumption of a proportion of anemia among under-five children of 50% since there is no study conducted at facility level in the area or in the region. The assumptions also include 95% confidence interval and 5% marginal error. Then, a 5% non-response rate was added, the final sample size was 404. Systematic random sampling technique was used to select the study participants. The average number of children visited under five outpatient department in the preceding three months was 858. K was calculated by dividing the total number of children visiting under five outpatient department in the last three months by the sample size ( $K = 858/404 = 2.12$ ). Every second children visiting under five outpatient department during study period was selected for assessment. All children aged 6–59 months who attend children's outpatient department of Gugufu health center and their guardian or parents consented to participate in the study were included. Children who lost blood by traumatic injury or surgery, taking iron and Vitamin-A supplement during the last 3 months, and those who were taking antihelmintic drugs in 3 months were excluded from the study.

## Data collection procedure

Pretested and structured questionnaires were used to collect socioeconomic and demographic characteristics of the family and child, feeding practice and other risk factors by interviewing mother/caregivers of the child. The questionnaire was adapted from previous similar literatures.

The questionnaire was prepared in English and translated in to Amharic language and then back to English to ensure its consistency. The questionnaire was pretested in Dessie health center that was not included in the actual study area on 10% of the sample size. Based on the pilot study result, certain revisions were made for the questionnaire prior to the actual study. The interview was conducted by two trained clinical nurses in the Amharic language.

Data on nutritional status were collected by measuring the weight and height of children under age 5 during the health center visit based on WHO recommendations[19]. The length was measured for children aged 6–23 months in a recumbent position and standing height was measured for children aged 24–59 months using the measuring board. The weight of the children was measured by a Salter scale. The children were without shoes on and wearing a minimum of clothes. In addition, mid-upper arm circumference (MUAC) tape was used to measure mid-upper arm circumference of the children. Each measurement was collected twice and the mean value of the two measurements was recorded on the questionnaire. Anthropometric assessment (Height-for-Age, Weight for- Height, and Weight-for-Age) was done using the WHO Anthro software, version 3.2.2 (WHO Anthro 2009, Geneva, Switzerland). Each of the three measurements was expressed in standard deviation (SD) units of Z-score from the

median of WHO-2006, standard population. Children whose height-for-age Z-score  $< -2$  SD from the median of the reference population were considered stunted, weight-for-height z-score  $< -2$  SD were considered wasted, and weight-for-age Z-score  $< -2$  SD were classified as underweight[19].

Capillary blood samples were collected from each child to determine hemoglobin concentration using HemoCue Hb 201 analyzer. HemoCue cuvettes are required for the analyzer. The Hb-201+ cuvettes contain a sodium deoxycholate dried reagent that lyses red blood cells to release free Hb and form a stable azidemethemoglobin which is detected at 570 nm and 880 nm. One drop of capillary blood was carefully collected in a microcuvette from a finger prick (heel prick in the case of children age 6–11 months) after the first drop of blood was wiped off with cotton wool. The filled microcuvette was loaded in the cuvette holder of calibrated HemoCue Hb201 analyser and after few seconds the hemoglobin measurement displayed. Then the results were recorded on the questionnaire. The HaemoCue method has been shown to be comparable in both accuracy and precision to the International Council for Standardization in Haematology (ICSH) reference method (cyanmethemoglobin method) for the photometric determination of Hb. The HemoCue Hb 201 analyzer has an internal electronic self test every time the analyzer is turned on, it will automatically verify the measurement performance. This test is performed at regular intervals if the analyzer remains switched on. In addition, the performance of the meter was checked on the daily bases by using control standard to increase test reliability. The test was performed by an experienced medical laboratory technologist. Standard operating procedure and manufacturers instruction were strictly followed[20, 21]. Strict aseptic technique and a separate lancet for each child were employed.

Based on WHO cut-off values, Children with Hb level  $< 110$  g/L were considered anemic. Anemic children were further categorized as children with mild anemia, moderate anemia and severe anemia which corresponds to Hb value 100–109 g/l, 70–99 g/l, and lower than 70 g/l respectively.

A clean plastic container marked with an identification number was distributed to collect a stool sample from each under-five child. Then, stool wet mount smear was prepared using saline and/or iodine solution for direct microscopic identification of intestinal parasites within 30 minutes of sample collection. The direct smear was examined first by 10x and then 40x objective for detection of helminthes eggs, larvae and protozoan parasites by experienced medical laboratory technologist.

### Data analysis procedures

All collected data were entered in to “EpiInfo version 3.1” and exported to SPSS version 20.0 statistical software for analysis. Normally distributed and continuous variables expressed as mean  $\pm$  SD, and non-normally distributed variables were presented as medians (quartiles 25 and 75%). Chi-square ( $\chi^2$ ) test was used to compare proportions. Multivariate logistic regression was used to calculate adjusted odds ratios (OR) and the corresponding 95% confidence intervals (CI). A p-value  $< 0.05$  was used to indicate statistical significance.

### Ethical considerations

Ethical approval was obtained from Wollo University Department of Medical Laboratory Science; a letter of support was written to Dessie health center to conduct the pre-test and to Gugufu health center to conduct the study. The study participant’s parent or guardian was informed about the purpose of the study and written informed consent was obtained before the questionnaire was administered and blood and stool samples were collected from the participant. To ensure confidentiality, participants’ data were linked to a code number. Any

abnormal test results of participants were communicated to the concerned body in the Health Center.

## Result

### Characteristics of study participants

A total of 404 under-five children participated in the study from November 2017 to February 2018. The mean age of the children was 23.1 months with an SD of  $\pm 14.4$  (median: 20 months, range: 6 to 58 months). More than half of the children were below two years of age 225 (55.7%) and female 222 (55.0%). Nearly three fourth, 295 (73.0%) of the children came from the rural part of the study area. Majority 210 (52.0%) of caregivers/mothers of the children were aged between 18 and 27, 241 (59.6) had no formal education, and 306 (75.7%) were Housewife by occupation with mean ( $\pm$ SD) mothers/caregivers age of 27.1 ( $\pm 5.3$ ) years. Majority 302 (74.8%) of the mothers had one child aged under five years, and 313 (77.5%) of the studied children had first birth order. The median (interquartile range) monthly income of the families of the studied children was 800 (600–1050) Ethiopian Birr (ETB), and 234 (57.9%) had a monthly income between 750 and 1500 ETB (Table 1).

Regarding nutritional status, more than half 211 (52.3%) of the children were underweight, 146 (36.1%) were wasted, and 214 (53%) were stunted. Only 30 (7.4%) of the children had started complementary foods before 6 months of their age. The stool investigations showed that 4.2% of children suffered from worm infestations (Table 2).

### Prevalence of anemia among under-five children

In this study, the overall prevalence of anemia was 41.1% (95% CI; 36.6% - 45.8%). The mean  $\pm$  SD hemoglobin concentration among the study participants was  $11.16 \pm 1.53$  g/dl. Of the anemic under-five children, 112 (67.5%) had mild anemia, 52 (31.3%) had moderate anemia, and 2 (1.2%) had severe anemia (Fig 1).

No difference was observed in prevalence between males and females (39.6% vs. 42.3%;  $P = 0.572$ ). Among the age groups, the highest prevalence was recorded in the age group of 6–11 months (57.0%) and it gradually decreases as the age of the children increased (Fig 2).

High prevalence of anemia was observed in children who were urban dwellers (49.5%), in children whose mothers aged  $\geq 39$  (57.1%) and had no formal education (48.1%). In addition, the high prevalence rate of anemia was found among children with a family monthly income of less than 750 ETB (47.6%), early ( $< 6$  months) introduction of complementary foods (73.3%), low MAUC (48.1%), and underweight (50.2%) (Table 3).

### Factors associated with anemia

After including risk factor variables with a  $P < 0.30$  on the bivariate analysis (Child age, Residence, Mothers age, Mothers education, Mothers occupation, Family's monthly income, Number of children aged  $< 5$  years, Introduction of complementary foods, Underweight, Wasted, Low MUAC, and Intestinal parasite), multivariate logistic regression analysis was performed to identify the independent association of each risk factor with anemia. Multivariate analysis showed that children in the age group of 6–11 and 12–23 months were 4.5 times (AOR = 4.52; 95% CI: 1.67–12.34) and 2.8 times (AOR = 2.79; 95% CI: 1.04–7.51) more likely to be anemic than children in the age range of 48–59 months, respectively. Children living in an urban area were 1.8 times (AOR = 1.83; 95% CI: 1.05–3.18) more likely to be anemic than those living in a rural area. Children with illiterate (or no formal education) mothers, and with primary education were 7 times (AOR = 7.05; 95% CI: 2.93–17.01) and 3.3 times (AOR = 3.26;

**Table 1. Socio-demographic characteristics of children under five years and mothers attending Gugufitu Health Center, Northeast Ethiopia, (n = 404).**

| Characteristics                  |                           | Frequencies | Percent (%) |
|----------------------------------|---------------------------|-------------|-------------|
| Child sex                        | Male                      | 182         | 45.0        |
|                                  | Female                    | 222         | 55.0        |
| Child age                        | 6–11 months               | 114         | 28.2        |
|                                  | 12–23 months              | 111         | 27.5        |
|                                  | 24–35 months              | 82          | 20.3        |
|                                  | 36–47 months              | 50          | 12.4        |
|                                  | 48–59 months              | 47          | 11.6        |
| Residence                        | Urban                     | 111         | 27.5        |
|                                  | Rural                     | 293         | 72.5        |
| Mothers age                      | 18–27 years               | 210         | 52.0        |
|                                  | 28–38 years               | 187         | 46.3        |
|                                  | 39–40 years               | 7           | 1.7         |
| Mothers education                | Non-formal                | 241         | 59.6        |
|                                  | Primary                   | 109         | 27.0        |
|                                  | ≥ Secondary               | 54          | 13.4        |
| Mothers occupation               | Housewife                 | 306         | 75.7        |
|                                  | Small-scale business      | 16          | 4.0         |
|                                  | Government employee       | 3           | 0.7         |
|                                  | Farmer                    | 79          | 19.6        |
| Family's monthly income          | < 750 ETB                 | 147         | 36.4        |
|                                  | 750–1500 ETB              | 234         | 57.9        |
|                                  | > 1500 ETB                | 23          | 5.7         |
| Birth order                      | 1 <sup>st</sup>           | 313         | 77.4        |
|                                  | 2 <sup>nd</sup>           | 54          | 13.4        |
|                                  | 3 <sup>rd</sup>           | 25          | 6.2         |
|                                  | 4 <sup>th</sup> and above | 12          | 3.0         |
| Number of children aged <5 years | 0                         | 14          | 3.5         |
|                                  | 1                         | 302         | 74.7        |
|                                  | ≥2                        | 88          | 21.8        |

ETB = Ethiopian birr

<https://doi.org/10.1371/journal.pone.0218961.t001>

95% CI: 1.29–8.24) more likely to be anemic than children with mother of secondary and above education level. Children with a family monthly income of <750 ETB, and 750–1500 ETB were 5.2 times (AOR = 5.19; 95% CI: 1.24–21.75) and 5.9 times (AOR = 5.89; 95% CI: 1.45–23.98) more likely to be anemic than children with a family monthly income of >1500 ETB. Children with early (<6 months) introduction of complementary foods was 3.5 times (AOR = 3.53; 95% CI: 1.23–10.18) more likely to be anemic than children with timely (>6 months) initiation of complementary foods. Similarly, Underweight children were 2.1 times (AOR = 2.11; 95% CI: 1.21–3.69) more likely to be anemic than children with normal weight (Table 4).

## Discussion

This study assessed the prevalence and associated factors of anemia among children aged 6 to 59 months in Gugufitu, Northeast Ethiopia. The overall prevalence of anemia was 41.1% (95% CI: 36.6% - 45.8%), this finding was similar to 2016 Ethiopian DHS prevalence reported for the Amhara Region (42%) [5] and study conducted in Jimma, Ethiopia (46%) [22]. However, the

**Table 2. Anthropometric status and Intestinal helminthes infection of children under five years attending at Gugufitu Health Center, Northeast Ethiopia, (n = 404).**

| Characteristics                     |                 | Frequencies | Percent (%) |
|-------------------------------------|-----------------|-------------|-------------|
| Introduction of complementary foods | < 6 months      | 30          | 7.4         |
|                                     | > 6 months      | 374         | 92.6        |
| Underweight                         | Not underweight | 193         | 47.8        |
|                                     | moderate        | 96          | 23.8        |
|                                     | severe          | 115         | 28.5        |
| Wasted                              | Not wasted      | 258         | 63.9        |
|                                     | moderate        | 63          | 15.6        |
|                                     | severe          | 83          | 20.5        |
| Stunted                             | Not stunted     | 190         | 47.0        |
|                                     | moderate        | 79          | 19.6        |
|                                     | severe          | 135         | 33.4        |
| Low MUAC                            | Yes             | 297         | 73.5        |
|                                     | No              | 107         | 26.5        |
| Intestinal parasite                 | positive        | 17          | 4.2         |
|                                     | negative        | 387         | 95.8        |

MUAC = mid-upper arm circumference

<https://doi.org/10.1371/journal.pone.0218961.t002>

result of the present study is lower than studies conducted in Nepal (49.5%)[23], South-East Nigeria (49.2%)[24], Hohoe municipality and Volta Regional Hospital of Ghana(47.5% &55.0%)[25, 26], and Limpopo Province, South Africa (75.0%)[27].The difference in the prevalence might be due to variation in the study design, sampling techniques, and sample size. The difference might also be due to variation in the geographical location of the study participants or due to variation in socio-demographic characteristics or socioeconomic status of parents in the areas.

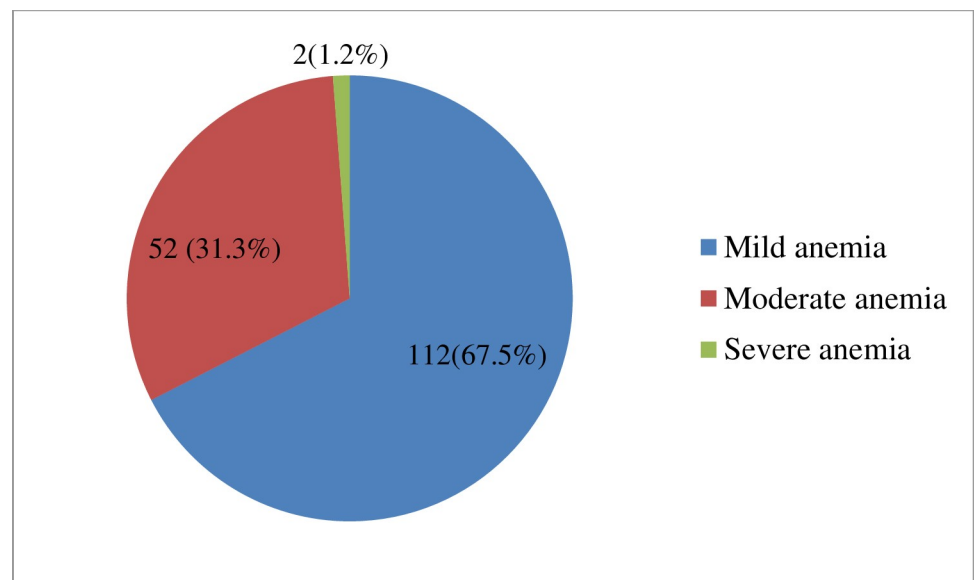

**Fig 1. Distribution of anemia by severity among the anemic children under five years attending Gugufitu Health Center, Northeast Ethiopia, (n = 166).**

<https://doi.org/10.1371/journal.pone.0218961.g001>

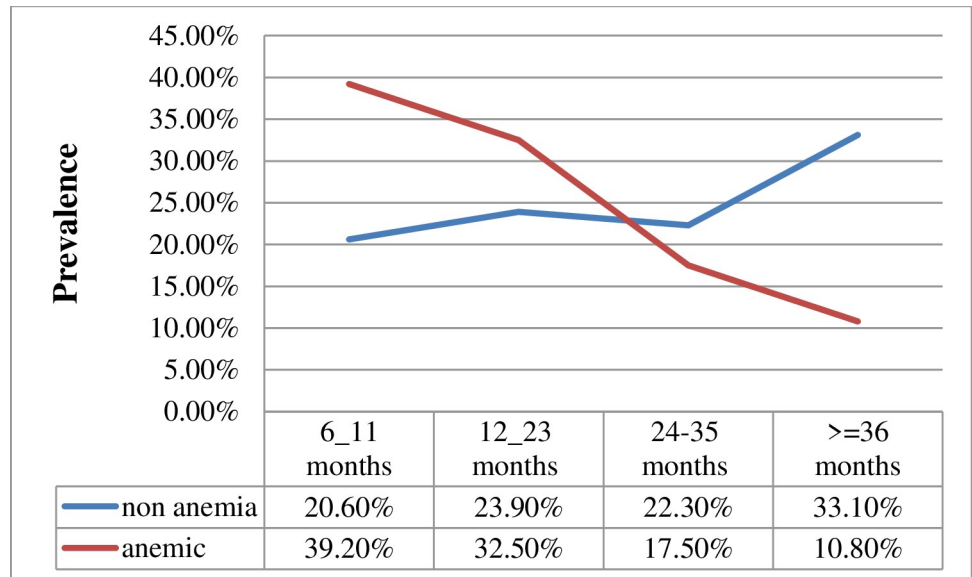

Fig 2. Distribution of anemia prevalence by age in children under five years attending Gugufitu Health Center, Northeast Ethiopia.

<https://doi.org/10.1371/journal.pone.0218961.g002>

Regarding the levels of anemic status, in this study, the majority of the anemic children had mild anemia (67.5%) followed by moderate anemia (31.3%) and severe anemia (1.2%). This finding is in agreement with studies conducted in Nepal [23], Hohoe municipality, Ghana [25], and India [28]. However, our result is deviated from EDHS 2016 report [5] and study in Volta Regional Hospital of Ghana [26], which showed high moderate anemia.

In this study, there was a higher prevalence of anemia among children under two years old and it decreased as the age of the children increased. This finding is supported by other studies conducted in Ethiopia [5, 29, 30] and other developing countries [25, 31, 32]. This might be due to high iron demands associated with rapid growth rate and erythropoiesis, diets poor in bio-available iron, and low maternal iron reserve during pregnancy [33].

Similar to study reports in South-East Nigeria [24] and the Volta Regional Hospital of Ghana [26], the present study found that sex difference did not show association with anemia. However, other studies found a higher prevalence of anemia among boys than girls [11, 29], and also in girls than boys [27]. This inconsistency may be explained by the social norms in differential intake of iron-rich foods between genders; however, subsequent studies are required to better understand this complex issue.

The present study found an association between the levels of maternal education and anemia which is in agreement with other studies [11, 32, 34–37]. Children of mothers with low educational levels were 3.3–7 times more likely to be anemic than children of a mother with secondary and above education level. This may be explained by the fact that education enhances the mother’s knowledge needed for their children’s health and an appropriate feeding practice, which help to improve their children nutritional status. However, this finding is inconsistent with the study conducted in Northwest Ethiopia [38]. The present study also found that children with low family income were 5.2–5.9 times more likely to be anemic than those with high family income. This finding was similar to studies conducted in other parts of the country and countries, which reported that children from poor families were at risk of anemia compared to their counterparts [11, 13, 30, 32, 36]. A possible explanation for the high prevalence of anemia might be that families with low income are less likely to purchase



**Table 3. Prevalence of anemia among children under five years attending Gugufitu Health Center, Northeast Ethiopia, (n = 404).**

| Characteristics                     | Anemia                    |           | P value*   |        |
|-------------------------------------|---------------------------|-----------|------------|--------|
|                                     | No n(%)                   | Yes n(%)  |            |        |
| Child sex                           | Male                      | 110(60.4) | 72(39.6)   | 0.572  |
|                                     | Female                    | 128(57.7) | 94(42.3)   |        |
| Child age                           | 6–11 months               | 49(43.0)  | 65(57)     | <0.001 |
|                                     | 12–23 months              | 57(51.4)  | 54(48.6)   |        |
|                                     | 24–35 months              | 53(64.6)  | 29(35.4)   |        |
|                                     | 36–47 months              | 42(84.0)  | 8(16.0)    |        |
|                                     | 48–59 months              | 37(78.7)  | 10(21.3)   |        |
| Residence                           | Urban                     | 56(50.5)  | 55(49.5)   | 0.033  |
|                                     | Rural                     | 182(62.1) | 111(37.9)  |        |
| Mothers age                         | 18–27 years               | 105(50)   | 105(50)    | 0.001  |
|                                     | 28–38 years               | 130(69.5) | 57(30.5)   |        |
|                                     | 39–40 years               | 3(42.9)   | 4(57.1)    |        |
| Mothers education                   | Non-formal                | 125(51.9) | 116 (48.1) | <0.001 |
|                                     | Primary                   | 69(63.3)  | 40(36.7)   |        |
|                                     | ≥ Secondary               | 44(81.5)  | 10(18.5)   |        |
| Mothers occupation                  | Housewife                 | 174(56.9) | 132(43.1)  | 0.290  |
|                                     | Small-scale business      | 10(62.5)  | 6(37.5)    |        |
|                                     | Gov employee              | 3(100.0)  | 0(0.0)     |        |
|                                     | Farmer                    | 51(64.6)  | 28(35.4)   |        |
| Family's monthly income             | < 750 ETB                 | 77(52.4)  | 70(47.6)   | 0.006  |
|                                     | 750–1500 ETB              | 141(60.3) | 93(39.7)   |        |
|                                     | > 1500 ETB                | 20(87.0)  | 3(13.0)    |        |
| Birth order                         | 1 <sup>st</sup>           | 178(56.9) | 135(43.1)  | 0.481  |
|                                     | 2 <sup>nd</sup>           | 35(64.8)  | 19(35.2)   |        |
|                                     | 3 <sup>rd</sup>           | 17(68.0)  | 8(32.0)    |        |
|                                     | 4 <sup>th</sup> and above | 8(66.7)   | 4(33.3)    |        |
| Number of children aged <5 years    | 0                         | 4(28.6)   | 10(71.4)   | 0.058  |
|                                     | 1                         | 183(60.6) | 119(39.4)  |        |
|                                     | ≥2                        | 51(58.0)  | 37(42.0)   |        |
| Introduction of complementary foods | < 6 months                | 8(26.7)   | 22(73.3)   | <0.001 |
|                                     | > 6 months                | 230(61.5) | 144(38.5)  |        |
| Underweight                         | No                        | 133(68.9) | 60(31.1)   | <0.001 |
|                                     | Yes                       | 105(49.8) | 106(50.2)  |        |
| Wasted                              | No                        | 159(61.6) | 99(38.4)   | 0.171  |
|                                     | Yes                       | 79(54.1)  | 67(45.9)   |        |
| Stunted                             | No                        | 111(58.4) | 79(41.6)   | 0.930  |
|                                     | Yes                       | 127(59.3) | 87(40.7)   |        |
| Low MUAC                            | Yes                       | 154(51.9) | 143(48.1)  | <0.001 |
|                                     | No                        | 84(78.5)  | 23(21.5)   |        |
| Intestinal parasite                 | No                        | 231(59.7) | 156(40.3)  | 0.129  |
|                                     | Yes                       | 7(41.2)   | 10(58.8)   |        |

ETB = Ethiopian birr; MUAC: mid-upper arm circumference

\*significant at p < 0.05

<https://doi.org/10.1371/journal.pone.0218961.t003>

**Table 4. Factors associated with anemia among children under five years attending Gugufitu Health Center, Northeast Ethiopia, (n = 404).**

| Variable                                   | Anemia     |            | Crude OR (95% CI)          | Adjusted OR (95%CI)        |
|--------------------------------------------|------------|------------|----------------------------|----------------------------|
|                                            | Yes, n (%) | No, n (%)  |                            |                            |
| <b>Age</b>                                 |            |            |                            |                            |
| 6–11 months                                | 65 (57.0)  | 49 (43.0)  | <b>4.91 (2.23–10.82) *</b> | <b>4.52 (1.67–12.34) *</b> |
| 12–23 months                               | 54 (48.6)  | 57 (51.4)  | <b>3.51 (1.59–7.74) *</b>  | <b>2.79 (1.04–7.51) *</b>  |
| 24–35 months                               | 29 (35.4)  | 53 (64.6)  | 2.03 (0.88–4.65)           | 1.66 (0.63–4.39)           |
| 36–47 months                               | 8 (16.0)   | 42 (84.0)  | 0.71 (0.25–1.97)           | 0.43 (0.12–1.48)           |
| 48–59 months                               | 10 (21.3)  | 37 (78.7)  | 1.00                       | 1.00                       |
| <b>Residence</b>                           |            |            |                            |                            |
| Urban                                      | 55 (49.5)  | 56 (50.5)  | <b>1.61 (1.04–2.50) *</b>  | <b>1.83 (1.05–3.18) *</b>  |
| Rural                                      | 111 (37.9) | 182 (62.1) | 1.00                       | 1.00                       |
| <b>Mothers educational status</b>          |            |            |                            |                            |
| Illiterate/No formal                       | 116 (48.1) | 125 (51.9) | <b>4.08 (1.97–8.49) *</b>  | <b>7.05 (2.93–17.01) *</b> |
| Primary                                    | 40 (36.7)  | 69 (63.3)  | <b>2.55 (1.16–5.62) *</b>  | <b>3.26 (1.29–8.24) *</b>  |
| ≥ Secondary                                | 10 (18.5)  | 44 (81.5)  | 1.00                       | 1.00                       |
| <b>Monthly income</b>                      |            |            |                            |                            |
| <750 ETB                                   | 70 (47.6)  | 77 (52.4)  | <b>6.06 (1.73–21.28) *</b> | <b>5.19 (1.24–21.75) *</b> |
| 750–1500 ETB                               | 93 (39.7)  | 141 (60.3) | <b>4.40 (1.27–15.22) *</b> | <b>5.89 (1.45–23.98) *</b> |
| >1500 ETB                                  | 3 (13.0)   | 20 (87.0)  | 1.00                       | 1.00                       |
| <b>Introduction of complementary foods</b> |            |            |                            |                            |
| < 6 months                                 | 22 (73.3)  | 8 (26.7)   | <b>4.39 (1.91–10.13) *</b> | <b>3.53 (1.23–10.18) *</b> |
| > 6 months                                 | 144 (38.5) | 230 (61.5) | 1.00                       | 1.00                       |
| <b>Underweight</b>                         |            |            |                            |                            |
| No                                         | 60(31.1)   | 133(68.9)  | 1.00                       | 1.00                       |
| Yes                                        | 106(50.2)  | 105(49.8)  | <b>2.24(1.49–3.36) *</b>   | <b>2.11(1.21–3.69) *</b>   |

OR = odds ratio, CI = confidence interval, 1 = reference

\*statistically significant association (p<0.05)

<https://doi.org/10.1371/journal.pone.0218961.t004>

nutrient-rich foods (like iron, vitamins, and etc), secure food availability, and afford health service during illness for their children. The higher prevalence of anemia among children with less educated mothers and low-income families indicates that anemia is a marker of socioeconomic disadvantage. [39, 40].

The observed higher prevalence of anemia among children with early (<6 months) introduction of complementary foods was consistent with previous studies [11, 41]. Complementing breast milk before 6 months of age reduces the bioavailability of iron by up to 80%; the early introductions of complementary foods like cow’s milk interfering in the absorption of iron in the breast milk because cow’s milk has excess protein and minerals notably calcium and most digestive enzymes are inadequate at this age. In addition, early initiation of complementary feeding expose to microbial pathogens due to contamination and resulting high risk of diarrheal diseases, thereby malabsorption [5, 42]. However, this finding is in contrary to study in Sri Lanka which showed that children who were exclusively breastfed for 6 months or more were more likely to be anemic than children who were exclusively breastfed for less than 6 months[37].

Nutritional status also associated with anemia among children aged 6–59 months. In this study, Underweight children were 2.1times more likely to be anemic than children with normal weight. This finding is similar to a study conducted in Northern Ethiopia[30] and Brazil [43]. Usually, the causes of anemia and underweight (malnutrition) are similar and aggravated

by poverty and food insecurity. Food insecurity affects the nutritional status of children by compromising the quantity and quality of dietary intake, which contributes for development of anemia [6, 40].

One of the limitations of this study is the cross-sectional nature of the study design; it does not reveal causal links between independent variables and anemia. Due to constraint of resource, we were unable to measure serum ferritin concentration, soluble transferrin receptor concentration, folate levels, vitamin B12 levels, thalassemia, and G6PD deficiency; which could have helped in finding the causes of anemia. The other limitation is that this study is conducted at a health center; hence, further community based studies should be conducted to have findings more representing the whole population. Despite the limitations, we have determined the magnitude of anemia and identified important factors associated with anemia among children aged 6–59 months in Gugufu health center.

## Conclusions

This study has revealed that the prevalence of anemia in children less than five years is high and a severe public health problem in the study area. Age, residence, family income, maternal education, an introduction of complementary foods, and nutritional status were the factors significantly associated with anemia. Therefore, the policymakers should make a strategy that can reduce poverty and increase the awareness of women on breastfeeding, nutrition, and other associated factors to reduce anemia.

## Supporting information

**S1 File. Questionnaire used for data collection.**

(DOCX)

**S1 Dataset.**

(XLSX)

## Acknowledgments

We would like to acknowledge Wollo University and Gugufu Health Center staffs for the support given to undertake this study. Our special thanks and appreciation also goes to all children and their mothers who voluntarily participated in this study.

## Author Contributions

**Conceptualization:** Angesom Gebreweld, Temesgen Fisha.

**Data curation:** Angesom Gebreweld, Neima Ali, Radiya Ali, Temesgen Fisha.

**Formal analysis:** Angesom Gebreweld, Neima Ali, Radiya Ali, Temesgen Fisha.

**Investigation:** Angesom Gebreweld, Neima Ali, Radiya Ali, Temesgen Fisha.

**Methodology:** Angesom Gebreweld, Neima Ali, Radiya Ali, Temesgen Fisha.

**Project administration:** Angesom Gebreweld, Temesgen Fisha.

**Resources:** Angesom Gebreweld, Neima Ali, Radiya Ali, Temesgen Fisha.

**Software:** Angesom Gebreweld, Temesgen Fisha.

**Supervision:** Angesom Gebreweld, Neima Ali, Radiya Ali, Temesgen Fisha.

**Validation:** Angesom Gebreweld, Neima Ali, Radiya Ali, Temesgen Fisha.

**Visualization:** Angesom Gebreweld, Radiya Ali, Temesgen Fisha.

**Writing – original draft:** Angesom Gebreweld.

**Writing – review & editing:** Angesom Gebreweld, Neima Ali, Radiya Ali, Temesgen Fisha.

## References

1. Lanzkowsky P. Manual of pediatric hematology and oncology. 5<sup>th</sup> ed. Elsevier; 2005.
2. WHO. Haemoglobin concentrations for the diagnosis of anaemia and assessment of severity. Vitamin and Mineral Nutrition Information System. Geneva, World Health Organization, 2011. (WHO/NMH/NHD/MNM/11.1).
3. Benoist Bd, McLean E, Egli I, Cogswell M. Worldwide prevalence of anaemia 1993–2005: WHO global database on anaemia. Geneva, World Health Organization. 2008.
4. McLean E, Cogswell M, Egli I, Wojdyla D, De Benoist B. Worldwide prevalence of anaemia, WHO vitamin and mineral nutrition information system, 1993–2005. *Public health nutrition*. 2009; 12(4):444–54. <https://doi.org/10.1017/S1368980008002401> PMID: 18498676
5. Central Statistical Agency (CSA) [Ethiopia] and ICF. Ethiopia Demographic and Health Survey 2016. Addis Ababa, Ethiopia, and Rockville, Maryland, USA: CSA and ICF, 2017.
6. Adish A, Esrey S, Gyorkos T, Johns T. Risk factors for iron deficiency anaemia in preschool children in northern Ethiopia. *Public health nutrition*. 1999; 2(3):243–52. PMID: 10512558
7. Lopez A, Cacoub P, Macdougall IC, Peyrin-Biroulet L. Iron deficiency anaemia. *The Lancet*. 2016; 387(10021):907–16.
8. Pacifici GM. Effects of Iron in Neonates and Young Infants: a Review. *International Journal of Pediatrics*. 2016; 4(7):2256–71.
9. Crawley J. Reducing the burden of anemia in infants and young children in malaria-endemic countries of Africa: from evidence to action. *The American journal of tropical medicine and hygiene*. 2004; 71(2\_suppl):25–34.
10. Janus J, Moerschel SK. Evaluation of Anemia in Children. *American Family Physician*. 2010; 81(12):1462–1471. PMID: 20540485
11. Woldie H, Kebede Y, Tariku A. Factors associated with anemia among children aged 6–23 months attending growth monitoring at Tsitsika Health Center, Wag-Himra Zone, Northeast Ethiopia. *Journal of nutrition and metabolism*. 2015; 2015.
12. Ngesa O, Mwambi H. Prevalence and risk factors of anaemia among children aged between 6 months and 14 years in Kenya. *PLoS One*. 2014; 9(11):e113756. <https://doi.org/10.1371/journal.pone.0113756> PMID: 25423084
13. Cardoso MA, Scopel KK, Muniz PT, Villamor E, Ferreira MU. Underlying factors associated with anemia in Amazonian children: a population-based, cross-sectional study. *PloS one*. 2012; 7(5):e36341. <https://doi.org/10.1371/journal.pone.0036341> PMID: 22574149
14. Grantham-McGregor S, Baker-Henningham H. Iron deficiency in childhood: causes and consequences for child development. *Annales Nestlé (English ed)*. 2010; 68(3):105–19.
15. Oppenheimer SJ. Iron and its relation to immunity and infectious disease. *The Journal of nutrition*. 2001; 131(2):616S–35S.
16. Lozoff B. Iron deficiency and child development. *Food and nutrition bulletin*. 2007; 28(4\_suppl4):S560–S71.
17. Haas JD, Brownlie IVT. Iron deficiency and reduced work capacity: a critical review of the research to determine a causal relationship. *The Journal of nutrition*. 2001; 131(2):676S–90S.
18. Brabin BJ, Premji Z, Verhoeff F. An analysis of anemia and child mortality. *The Journal of nutrition*. 2001; 131(2):636S–48S.
19. WHO. WHO child growth standards: length/height for age, weight-for-age, weight-for-length, weight-for-height and body mass index-for-age, methods and development: World Health Organization; 2006.
20. National Committee for Clinical Laboratory Standards. H15-A3: Reference and selected procedures for the quantitative determination of hemoglobin in blood. 3. 2000.
21. HemoCue America. Hb-201+ Product Sheet. Available from: [http://www.hemocue.us/~media/hemocue-images/hemocue\\_us-images/pdf/hemoglobin—lit1056—hb-201product-sheet.pdf?la=enUS](http://www.hemocue.us/~media/hemocue-images/hemocue_us-images/pdf/hemoglobin—lit1056—hb-201product-sheet.pdf?la=enUS).
22. Getaneh T, Girma T, Belachew T, Teklemariam S. The utility of pallor detecting anemia in under five years old children. *Ethiopian medical journal*. 2000; 38(2):77–84. PMID: 11144886

23. Joshi S, Pradhan MP, Joshi U. Prevalence of anaemia among children under five years in tertiary care hospital of Nepal. *Medical Journal of Shree Birendra Hospital*. 2014; 13(1):33–6.
24. Ughasoro MD, Emodi I, Okafor H, Ibe B. Prevalence and risk factors of anaemia in paediatric patients in South-East Nigeria. *South African Journal of Child Health*. 2015; 9(1):14–7.
25. Parbey PA, Kyei-Duodu G, Takramah W, Tarkang E, Agboli E, Takase M, et al. Prevalence of Anaemia and Associated Risk Factors among Children Under Five Years in Hohoe Municipality, Ghana. *Journal of Scientific Research & Reports*. 2017; 15(2):1–12.
26. Adu-Amankwaah J, Allotey EA, Kwasi DA, Afeke I, Owiafe PK, Adiukwu PC, et al. Prevalence and Morphological Types of Anaemia among Children Under-Five Years in the Volta Regional Hospital of Ghana. *Open Access Library Journal*. 2018; 5(02):1.
27. Heckman J, Samie A, Bessong P, Ntsieni M, Hamandi H, Kohler M, et al. Anaemia among clinically well under-fives attending a community health centre in Venda, Limpopo Province. *South African Medical Journal*. 2010; 100(7): 445–448. PMID: [20822592](https://pubmed.ncbi.nlm.nih.gov/20822592/)
28. Shakuntal G, Mane AS. Anemia in pediatric patients under five years old: A cross-sectional study. *Scholars Journal of Applied Medical Sciences*. 2016; 4(6):2020–2022.
29. Guled RA, Mamat NM, Balachew T, Bakar MA, Azdie W, Assefa N. Predictors and prevalence of anemia, among children aged 6 to 59 months in shebelle zone, somali region, eastern Ethiopia: A cross sectional study. *International Journal of Development Research*. 2017; 7(1):11189–96.
30. Gebreegziabihir G, Etana B, Niggusie D. Determinants of anemia among children aged 6–59 months living in Kilde Awulaelo Woreda, Northern Ethiopia. *Anemia*. 2014; 2014:1–9.
31. Kuziga F, Adoke Y, Wanyenze RK. Prevalence and factors associated with anaemia among children aged 6 to 59 months in Namutumba district, Uganda: a cross-sectional study. *BMC pediatrics*. 2017; 17(1):25–33. <https://doi.org/10.1186/s12887-017-0782-3> PMID: [28100200](https://pubmed.ncbi.nlm.nih.gov/28100200/)
32. Khan JR, Awan N, Misu F. Determinants of anemia among 6–59 months aged children in Bangladesh: evidence from nationally representative data. *BMC pediatrics*. 2016; 16(1):3–14.
33. Tolentino K, Friedman JF. An update on anemia in less developed countries. *The American journal of tropical medicine and hygiene*. 2007; 77(1):44–51. PMID: [17620629](https://pubmed.ncbi.nlm.nih.gov/17620629/)
34. Simburanga RH, Kamugisha E, Hokororo A, Kidenya BR, Makani J. Prevalence and factors associated with severe anaemia amongst under-five children hospitalized at Bugando Medical Centre, Mwanza, Tanzania. *BMC hematology*. 2015; 15(1):13.
35. Fosu MO, Frimpong F, Arthur M. Factors associated with haemoglobin prevalence among Ghanaian children aged 6–59 months. *J Biology, Agric Healthc*. 2014; 4(2):132–40.
36. Xin Q-Q, Chen B-W, Yin D-L, Xiao F, Li R-L, Yin T, et al. Prevalence of Anemia and its Risk Factors among Children under 36 Months Old in China. *Journal of tropical pediatrics*. 2017; 63(1):36–42. <https://doi.org/10.1093/tropej/fmw049> PMID: [27543970](https://pubmed.ncbi.nlm.nih.gov/27543970/)
37. Malkanthi R, Silva K, Jayasinghe-Mudalige UK. Risk factors associated with high prevalence of anemia among children under 5 years of age in paddy-farming households in Sri Lanka. *Food and Nutrition Bulletin*. 2010; 31(4):475–82.
38. Aleign T, Degarege A, Erko B. Prevalence and factors associated with undernutrition and anaemia among school children in Durbete Town, northwest Ethiopia. *Archives of Public Health*. 2015; 73(1):34. <https://doi.org/10.1186/s13690-015-0084-x> PMID: [26261719](https://pubmed.ncbi.nlm.nih.gov/26261719/)
39. Allen L, de Benoist B, Dary O, Hurrell R. Guidelines on food fortification with micronutrients. Geneva: World Health Organization and Food and Agriculture Organization of the United Nations. 2006.
40. Ali D, Saha KK, Nguyen PH, Diressie MT, Ruel MT, Menon P, et al. Household Food Insecurity Is Associated with Higher Child Undernutrition in Bangladesh, Ethiopia, and Vietnam, but the Effect Is Not Mediated by Child Dietary Diversity. *The Journal of nutrition*. 2013; 143(12):2015–21. <https://doi.org/10.3945/jn.113.175182> PMID: [24089419](https://pubmed.ncbi.nlm.nih.gov/24089419/)
41. Novaes TG, Gomes AT, Silveira KCd, Magalhães EldS, Souza CL, Netto MP, et al. Prevalence and factors associated with anemia in children enrolled in daycare centers: A Hierarchical Analysis. *Revista Paulista de Pediatria*. 2017; 35(3):281–88. <https://doi.org/10.1590/1984-0462;2017;35;3;00008> PMID: [28977293](https://pubmed.ncbi.nlm.nih.gov/28977293/)
42. Oliveira MA, Osório MM. Cow's milk consumption and iron deficiency anemia in children. *Jornal de pediatria*. 2005; 81(5):361–7. <https://doi.org/10.2223/JPED.1386> PMID: [16247536](https://pubmed.ncbi.nlm.nih.gov/16247536/)
43. Santos RFd, Gonzalez ESC, Albuquerque ECD, Arruda IKGd, Diniz ADS, Figueroa JN, et al. Prevalence of anemia in under five-year-old children in a children's hospital in Recife, Brazil. *Revista brasileira de hematologia e hemoterapia*. 2011; 33(2):100–4. <https://doi.org/10.5581/1516-8484.20110028> PMID: [23284255](https://pubmed.ncbi.nlm.nih.gov/23284255/)
